# Supplementary material
Source: PubMed Central journal article supplement (PMC3737777)
Supplement: NIHMS493525-supplement-table_1-6.pdf [file NIHMS493525-supplement-table_1-6.pdf]

**Supplementary Table 1.** Gene frequencies (%) of the two and four-digit HLA-A and -C alleles detected in EBV-IgA/VCA positive controls (N = 287) and EBV-IgA/VCA negative controls (N = 342)

| HLA-A | Frequency        |                  | P value* | HLA-C | Frequency        |                  | P value* |
|-------|------------------|------------------|----------|-------|------------------|------------------|----------|
|       | EBV-IgA positive | EBV-IgA negative |          |       | EBV-IgA positive | EBV-IgA negative |          |
| 01    | 0.52             | 0.44             | ns       | 01    | 22.3             | 17.84            | ns       |
| 0101  | 0.35             | 0.44             | ns       | 0102  | 21.95            | 17.54            | ns       |
| 0103  | 0.17             | 0.0              | ns       | 0103  | 0.35             | 0.29             | ns       |
| 02    | 31.53            | 33.77            | ns       | 0202  | 0.17             | 0.15             | ns       |
| 0201  | 4.53             | 3.22             | ns       | 03    | 31.71            | 34.94            | ns       |
| 0203  | 13.76            | 16.52            | ns       | 0302  | 12.20            | 14.47            | ns       |
| 0206  | 2.09             | 2.49             | ns       | 0303  | 2.61             | 3.65             | ns       |
| 0207  | 11.15            | 11.40            | ns       | 0304  | 16.90            | 16.81            | ns       |
| 0211  | 0.00             | 0.15             | ns       | 0317  | 0.0              | 0.0              | ns       |
| 03    | 1.05             | 1.32             | ns       | 04    | 4.88             | 4.24             | ns       |
| 0301  | 1.05             | 1.17             | ns       | 0401  | 2.61             | 2.05             | ns       |
| 0302  | 0.0              | 0.15             | ns       | 0403  | 2.26             | 2.19             | ns       |
| 11    | 32.40            | 32.31            | ns       | 0501  | 0.0              | 0.15             | ns       |
| 1101  | 28.57            | 29.53            | ns       | 0602  | 1.57             | 1.90             | ns       |
| 1102  | 3.83             | 2.78             | ns       | 07    | 17.77            | 20.47            | ns       |
| 2301  | 0.17             | 0.15             | ns       | 0701  | 0.52             | 0.88             | ns       |
| 24    | 15.16            | 12.72            | ns       | 0702  | 17.25            | 19.15            | ns       |
| 2402  | 14.63            | 12.43            | ns       | 0704  | 0.0              | 0.44             | ns       |
| 2403  | 0.35             | 0.15             | ns       | 0801  | 9.93             | 9.06             | ns       |
| 2405  | 0.0              | 0.0              | ns       | 12    | 5.40             | 3.36             | ns       |
| 2407  | 0.17             | 0.0              | ns       | 1202  | 2.96             | 1.61             | ns       |
| 2410  | 0.0              | 0.15             | ns       | 1203  | 2.44             | 1.75             | ns       |
| 2501  | 0.0              | 0.0              | ns       | 14    | 3.48             | 5.41             | ns       |
| 2601  | 1.05             | 1.32             | ns       | 1402  | 3.48             | 5.26             | ns       |
| 29    | 0.87             | 0.58             | ns       | 1403  | 0.0              | 0.15             | ns       |
| 2901  | 0.70             | 0.44             | ns       | 15    | 2.79             | 2.49             | ns       |
| 2902  | 0.17             | 0.15             | ns       | 1502  | 2.09             | 1.90             | ns       |
| 30    | 0.87             | 1.32             | ns       | 1504  | 0.0              | 0.0              | ns       |
| 3001  | 0.87             | 1.17             | ns       | 1505  | 0.70             | 0.44             | ns       |
| 3002  | 0.0              | 0.15             | ns       | 1517  | 0.0              | 0.15             | ns       |
| 3101  | 0.52             | 0.73             | ns       | 1602  | 0.0              | 0.0              | ns       |
| 32    | 0.17             | 0.0              | ns       |       |                  |                  |          |
| 3201  | 0.0              | 0.0              | ns       |       |                  |                  |          |
| 3203  | 0.17             | 0.0              | ns       |       |                  |                  |          |
| 3303  | 14.63            | 14.04            | ns       |       |                  |                  |          |
| 3401  | 0.0              | 0.0              | ns       |       |                  |                  |          |
| 6801  | 0.17             | 0.0              | ns       |       |                  |                  |          |
| 7400  | 0.87             | 1.32             | ns       |       |                  |                  |          |

\* “ns” = P > 0.05

**Supplementary Table 2.** Gene frequencies (%) of the two and four-digit HLA-B alleles detected in EBV-IgA/VCA positive controls (N = 287) and EBV-IgA/VCA negative controls (N = 342)

| HLA-B | Frequency        |                  | P value* | HLA-B | Frequency        |                  | P value* |
|-------|------------------|------------------|----------|-------|------------------|------------------|----------|
|       | EBV-IgA positive | EBV-IgA negative |          |       | EBV-IgA positive | EBV-IgA negative |          |
| 07    | 0.87             | 1.17             | ns       | 40    | 13.41            | 11.4             | ns       |
| 0702  | 0.17             | 0.58             | ns       | 4001  | 12.02            | 10.23            | ns       |
| 0705  | 0.70             | 0.58             | ns       | 4002  | 1.22             | 1.02             | ns       |
| 0801  | 0.17             | 0.44             | ns       | 4006  | 0.17             | 0.15             | ns       |
| 13    | 13.76            | 12.43            | ns       | 44    | 0.35             | 0.73             | ns       |
| 1301  | 12.89            | 11.40            | ns       | 4402  | 0.00             | 0.15             | ns       |
| 1302  | 0.87             | 1.02             | ns       | 4403  | 0.35             | 0.58             | ns       |
| 15    | 11.32            | 11.70            | ns       | 4501  | 0.17             | 0.00             | ns       |
| 1501  | 2.09             | 1.02             | ns       | 4601  | 17.25            | 14.04            | ns       |
| 1502  | 8.36             | 8.48             | ns       | 48    | 1.74             | 0.73             | ns       |
| 1503  | 0.00             | 0.00             | ns       | 4801  | 0.70             | 0.29             | ns       |
| 1510  | 0.00             | 0.15             | ns       | 4803  | 1.05             | 0.44             | ns       |
| 1511  | 0.00             | 0.73             | ns       | 4901  | 0.00             | 0.15             | ns       |
| 1512  | 0.17             | 0.44             | ns       | 5001  | 0.00             | 0.15             | ns       |
| 1518  | 0.00             | 0.15             | ns       | 51    | 5.23             | 5.85             | ns       |
| 1525  | 0.35             | 0.73             | ns       | 5101  | 4.36             | 5.26             | ns       |
| 1527  | 0.35             | 0.00             | ns       | 5102  | 0.87             | 0.58             | ns       |
| 18    | 0.00             | 0.58             | ns       | 5106  | 0.00             | 0.00             | ns       |
| 1801  | 0.00             | 0.44             | ns       | 5201  | 0.35             | 0.29             | ns       |
| 1802  | 0.00             | 0.15             | ns       | 5401  | 2.79             | 2.05             | ns       |
| 27    | 1.92             | 1.32             | ns       | 55    | 4.36             | 4.09             | ns       |
| 2704  | 1.39             | 1.17             | ns       | 5501  | 0.35             | 0.15             | ns       |
| 2705  | 0.17             | 0.00             | ns       | 5502  | 3.83             | 3.51             | ns       |
| 2706  | 0.35             | 0.15             | ns       | 5503  | 0.17             | 0.00             | ns       |
| 35    | 1.74             | 1.75             | ns       | 5507  | 0.00             | 0.44             | ns       |
| 3501  | 0.87             | 0.44             | ns       | 56    | 1.74             | 2.63             | ns       |
| 3503  | 0.00             | 0.29             | ns       | 5601  | 1.05             | 2.19             | ns       |
| 3505  | 0.87             | 1.02             | ns       | 5604  | 0.70             | 0.44             | ns       |
| 3530  | 0.00             | 0.00             | ns       | 5701  | 0.17             | 0.15             | ns       |
| 3701  | 0.17             | 0.73             | ns       | 5801  | 13.07            | 14.91            | ns       |
| 38    | 8.54             | 10.82            | ns       | 6701  | 0.17             | 0.29             | ns       |
| 3801  | 0.35             | 0.58             | ns       |       |                  |                  |          |
| 3802  | 8.19             | 10.23            | ns       |       |                  |                  |          |
| 39    | 0.70             | 1.61             | ns       |       |                  |                  |          |
| 3901  | 0.52             | 1.32             | ns       |       |                  |                  |          |
| 3905  | 0.00             | 0.15             | ns       |       |                  |                  |          |
| 3909  | 0.00             | 0.15             | ns       |       |                  |                  |          |
| 3915  | 0.17             | 0.00             | ns       |       |                  |                  |          |

\* “ns” = P > 0.05

**Supplementary Table 3.** Gene frequencies (%) of the two and four-digit HLA-A and -C alleles detected in NPC patients (N = 356) and controls (N = 629)

| HLA-A | Frequency    |          |          | HLA-Cw | Frequency    |          |          |
|-------|--------------|----------|----------|--------|--------------|----------|----------|
|       | NPC patients | Controls | P value* |        | NPC patients | Controls | P value* |
| 01    | 0.42         | 0.48     | ns       | 01     | 19.38        | 19.87    | ns       |
| 0101  | 0.42         | 0.40     | ns       | 0102   | 18.96        | 19.55    | ns       |
| 0103  | 0.0          | 0.08     | ns       | 0103   | 0.42         | 0.32     | ns       |
| 02    | 38.62        | 32.75    | 0.01     | 0202   | 0.0          | 0.16     | ns       |
| 0201  | 3.09         | 3.82     | ns       | 03     | 35.39        | 33.47    | ns       |
| 0203  | 15.45        | 15.26    | ns       | 0302   | 18.12        | 13.43    | 0.005    |
| 0206  | 5.2          | 2.31     | 0.0006   | 0303   | 1.83         | 3.18     | ns       |
| 0207  | 14.89        | 11.29    | 0.02     | 0304   | 15.31        | 16.85    | ns       |
| 0211  | 0.0          | 0.08     | ns       | 0317   | 0.14         | 0.0      | ns       |
| 03    | 0.7          | 1.19     | ns       | 04     | 3.51         | 4.53     | ns       |
| 0301  | 0.7          | 1.11     | ns       | 0401   | 2.53         | 2.31     | ns       |
| 0302  | 0.0          | 0.08     | ns       | 0403   | 0.98         | 2.23     | 0.05     |
| 11    | 23.74        | 32.35    | 0.0001   | 0501   | 0.0          | 0.08     | ns       |
| 1101  | 19.52        | 29.09    | <0.0001  | 0602   | 0.84         | 1.75     | ns       |
| 1102  | 4.21         | 3.26     | ns       | 07     | 22.19        | 19.24    | ns       |
| 2301  | 0.28         | 0.16     | ns       | 0701   | 0.28         | 0.72     | ns       |
| 24    | 12.92        | 13.83    | ns       | 0702   | 21.49        | 18.28    | ns       |
| 2402  | 12.36        | 13.43    | ns       | 0704   | 0.42         | 0.24     | ns       |
| 2403  | 0.0          | 0.24     | ns       | 0801   | 11.24        | 9.46     | ns       |
| 2405  | 0.14         | 0.0      | ns       | 12     | 1.12         | 4.29     | 0.0001   |
| 2407  | 0.28         | 0.08     | ns       | 1202   | 0.56         | 2.23     | 0.005    |
| 2410  | 0.14         | 0.08     | ns       | 1203   | 0.56         | 2.07     | 0.01     |
| 2501  | 0.14         | 0.0      | ns       | 14     | 4.92         | 4.53     | ns       |
| 2601  | 1.54         | 1.19     | ns       | 1402   | 4.92         | 4.45     | ns       |
| 29    | 0.0          | 0.72     | ns       | 1403   | 0.0          | 0.08     | ns       |
| 2901  | 0.0          | 0.56     | ns       | 15     | 1.12         | 2.62     | 0.03     |
| 2902  | 0.0          | 0.16     | ns       | 1502   | 0.98         | 1.99     | ns       |
| 30    | 0.56         | 1.11     | ns       | 1504   | 0.14         | 0.0      | ns       |
| 3001  | 0.56         | 1.03     | ns       | 1505   | 0.0          | 0.56     | ns       |
| 3002  | 0.0          | 0.12     | ns       | 1517   | 0.0          | 0.08     | ns       |
| 3101  | 0.14         | 0.64     | ns       | 1602   | 0.28         | 0.0      | ns       |
| 32    | 0.14         | 0.08     | ns       |        |              |          |          |
| 3201  | 0.14         | 0.0      | ns       |        |              |          |          |
| 3203  | 0.0          | 0.08     | ns       |        |              |          |          |
| 3303  | 20.51        | 14.31    | 0.0004   |        |              |          |          |
| 3401  | 0.14         | 0.0      | ns       |        |              |          |          |
| 6801  | 0.0          | 0.08     | ns       |        |              |          |          |
| 7400  | 0.14         | 1.11     | 0.02     |        |              |          |          |

\* “ns” = P > 0.05

**Supplementary Table 4.** Gene frequencies of two and four-digit HLA-B alleles detected in NPC patients (N = 356) and controls (N = 629)

| HLA-B | Frequency    |          |          | HLA-B | Frequency    |          |          |
|-------|--------------|----------|----------|-------|--------------|----------|----------|
|       | NPC patients | Controls | P value* |       | NPC patients | Controls | P value* |
| 07    | 0.0          | 1.03     | 0.01     | 40    | 16.29        | 12.32    | 0.01     |
| 0702  | 0.0          | 0.40     | ns       | 4001  | 14.75        | 11.05    | 0.02     |
| 0705  | 0.0          | 0.64     | ns       | 4002  | 0.98         | 1.11     | ns       |
| 0801  | 0.14         | 0.32     | ns       | 4006  | 0.56         | 0.16     | ns       |
| 13    | 8.43         | 13.04    | 0.002    | 44    | 0.28         | 0.56     | ns       |
| 1301  | 7.72         | 12.08    | 0.002    | 4402  | 0.0          | 0.08     | ns       |
| 1302  | 0.70         | 0.95     | ns       | 4403  | 0.28         | 0.48     | ns       |
| 15    | 10.67        | 11.53    | ns       | 4501  | 0.0          | 0.08     | ns       |
| 1501  | 0.84         | 1.51     | ns       | 4601  | 17.13        | 15.50    | ns       |
| 1502  | 8.71         | 8.43     | ns       | 48    | 1.69         | 1.19     | ns       |
| 1503  | 0.14         | 0.0      | ns       | 4801  | 0.84         | 0.48     | ns       |
| 1510  | 0.0          | 0.08     | ns       | 4803  | 0.84         | 0.72     | ns       |
| 1511  | 0.42         | 0.40     | ns       | 4901  | 0.0          | 0.08     | ns       |
| 1512  | 0.14         | 0.32     | ns       | 5001  | 0.0          | 0.08     | ns       |
| 1518  | 0.0          | 0.08     | ns       | 51    | 5.34         | 5.56     | ns       |
| 1525  | 0.42         | 0.56     | ns       | 5101  | 4.78         | 4.85     | ns       |
| 1527  | 0.0          | 0.16     | ns       | 5102  | 0.42         | 0.72     | ns       |
| 18    | 0.42         | 0.32     | ns       | 5106  | 0.14         | 0.0      | ns       |
| 1801  | 0.28         | 0.24     | ns       | 5201  | 0.14         | 0.32     | ns       |
| 1802  | 0.14         | 0.08     | ns       | 5401  | 2.39         | 2.38     | ns       |
| 27    | 0.0          | 1.59     | 0.001    | 55    | 0.56         | 4.21     | <0.0001  |
| 2704  | 0.0          | 1.27     | 0.005    | 5501  | 0.0          | 0.24     | ns       |
| 2705  | 0.0          | 0.08     | ns       | 5502  | 0.56         | 3.66     | <0.0001  |
| 2706  | 0.0          | 0.24     | ns       | 5503  | 0.0          | 0.08     | ns       |
| 35    | 2.53         | 1.75     | ns       | 5507  | 0.0          | 0.24     | ns       |
| 3501  | 1.26         | 0.64     | ns       | 56    | 0.84         | 2.23     | 0.02     |
| 3503  | 0.28         | 0.16     | ns       | 5601  | 0.28         | 1.67     | 0.006    |
| 3505  | 0.84         | 0.95     | ns       | 5604  | 0.56         | 0.56     | ns       |
| 3530  | 0.14         | 0.0      | ns       | 5701  | 0.0          | 0.16     | ns       |
| 3701  | 0.14         | 0.48     | ns       | 5801  | 19.10        | 14.07    | 0.003    |
| 38    | 12.78        | 9.78     | 0.04     | 6701  | 0.84         | 0.24     | ns       |
| 3801  | 0.14         | 0.48     | ns       |       |              |          |          |
| 3802  | 12.64        | 9.30     | 0.02     |       |              |          |          |
| 39    | 0.28         | 1.19     | 0.04     |       |              |          |          |
| 3901  | 0.28         | 0.95     | ns       |       |              |          |          |
| 3905  | 0.0          | 0.08     | ns       |       |              |          |          |
| 3909  | 0.0          | 0.08     | ns       |       |              |          |          |
| 3915  | 0.0          | 0.08     | ns       |       |              |          |          |

\* “ns” = P >0.05

**Supplementary Table 5.** Frequencies (%) of genotypes of HLA-A and -B showing a significant association with NPC risk between patients (N = 356) and controls (N = 629)

| Allele          | Frequencies (%) |          | OR    | P value |
|-----------------|-----------------|----------|-------|---------|
|                 | NPC patients    | Controls |       |         |
| <b>HLA-A</b>    |                 |          |       |         |
| 02,33           | 16.57           | 9.857    | 1.82  | 0.002   |
| 11,11           | 3.652           | 9.38     | 0.37  | 0.0009  |
| <b>HLA-B</b>    |                 |          |       |         |
| 40,58           | 8.99            | 3.66     | 2.6   | 0.0005  |
| 38,58           | 5.9             | 3.02     | 2.01  | 0.03    |
| 40,46           | 5.9             | 2.86     | 2.13  | 0.02    |
| 38,40           | 3.65            | 1.59     | 2.35  | 0.04    |
| 51,58           | 2.53            | 0.79     | 3.24  | 0.03    |
| <b>HLA-A,-B</b> |                 |          |       |         |
| 11,11-13,40     | 0               | 1.43     | 0.1   | 0.05    |
| 02,33-38,58     | 4.21            | 1.59     | 2.72  | 0.01    |
| 02,33-40,58     | 3.37            | 0.79     | 4.35  | 0.003   |
| 02,11-38,46     | 1.12            | 0.16     | 7.14  | 0.04    |
| 11,33-38,58     | 1.12            | 0.16     | 7.14  | 0.04    |
| 02,02-38,40     | 1.4             | 0        | 17.92 | 0.007   |

**Supplementary Table 6.** Odds Ratios of HLA genotypes for NPC development between patients (N = 356) and controls (N = 629/

| HLA genotype* | Frequency    |          | OR (95% CI)     | P value† |
|---------------|--------------|----------|-----------------|----------|
|               | NPC patients | Controls |                 |          |
| P/P           | 3.09         | 12.72    | 0.22(0.12-0.40) | <0.0001  |
| P/N           | 15.73        | 25.12    | 0.56(0.40-0.78) | 0.0006   |
| N/N           | 8.15         | 12.08    | 0.65(0.41-1.01) | ns       |
| P/S           | 16.01        | 20.99    | 0.72(0.51-1.01) | ns       |
| N/S           | 33.99        | 19.71    | 2.10(1.57-2.81) | <0.0001  |
| S/S           | 23.08        | 9.38     | 2.89(2.03-4.12) | <0.0001  |

\* "P" = protective haplotype; "S" = susceptible haplotype; "N" = neutral haplotype.

† "ns" = P > 0.05
